# Supplementary material for: Spinal cord gray matter atrophy is associated with disability in spinal muscular atrophy
Source: PubMed Central journal article supplement (PMC11706851; doi:10.1007/s00415-024-12740-3), 2025-01-07
Supplement: 415_2024_12740_MOESM1_ESM.pdf [file 415_2024_12740_MOESM1_ESM.pdf]

**Supplemental material: Flowchart**

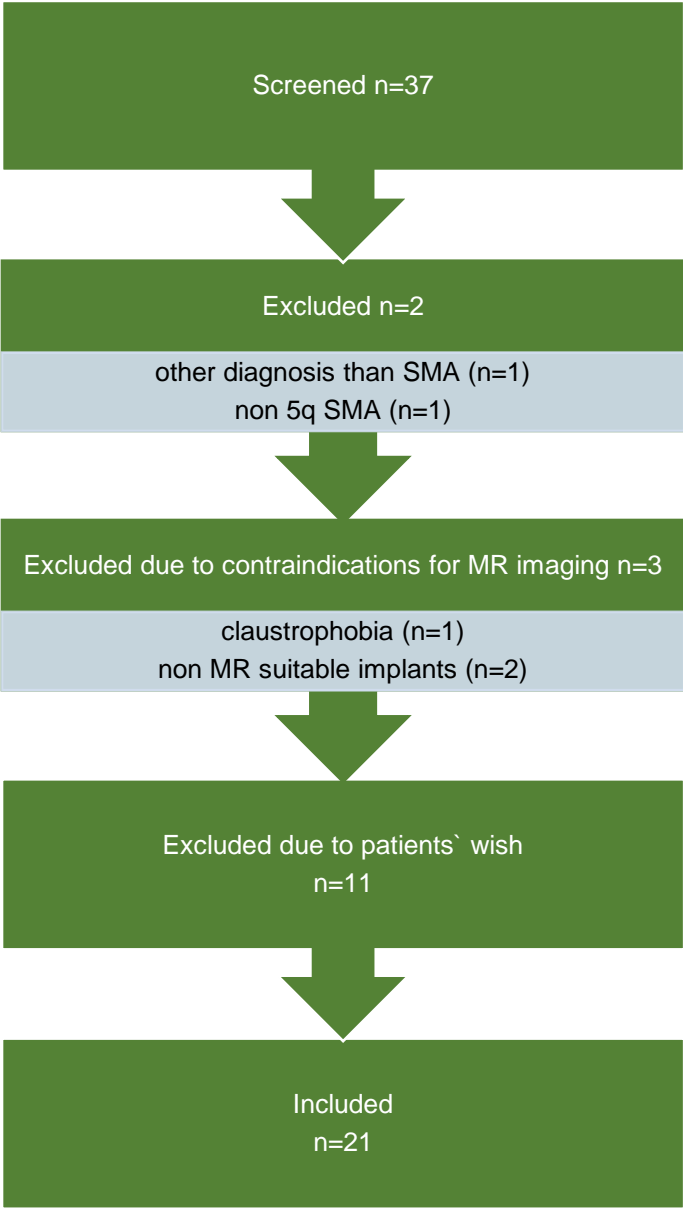

**Appendix Figure 1:** Flowchart of inclusion of SMA patients
